# Supplementary material for: A facile synthetic approach for SiO2@Co3O4 core–shell nanorattles with enhanced peroxidase-like activity
Source: Royal Society of Chemistry journal article supplement (doi:10.1039/c4ra12596g), 2014-12-11
Supplement: c4ra12596g1.pdf [file c4ra12596g1.pdf]

## Electronic supplementary information

### A facile synthetic approach for $\text{SiO}_2@\text{Co}_3\text{O}_4$ core-shell nanorattles with enhanced peroxidase-like activity

Syam Kandula and Pethaiyan Jeevanandam\*

Department of Chemistry, Indian Institute of Technology Roorkee, Roorkee-247667, India

\* E-mail: [jeevafcy@iitr.ac.in](mailto:jeevafcy@iitr.ac.in) Tel: +91-1332-285444; Fax: 91-1332 -273560

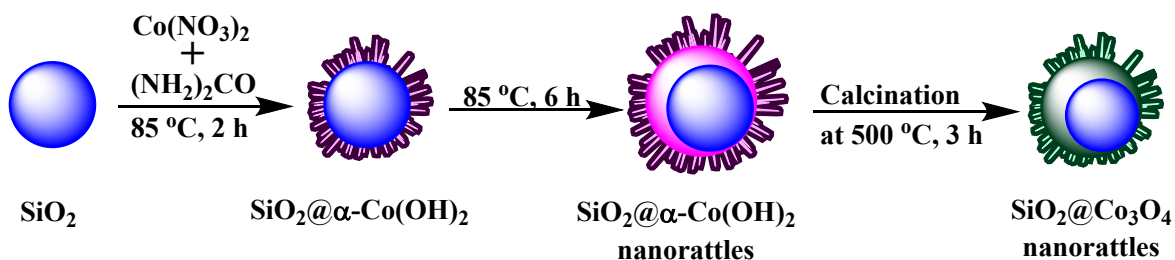

**Fig. S1** An overview image for the formation of  $\text{SiO}_2@\text{Co}_3\text{O}_4$  core-shell nanorattles
